# Supplementary material
Source: PubMed Central journal article supplement (PMC2768476)
Supplement: NIHMS121339-supplement-01.pdf [file NIHMS121339-supplement-01.pdf]

| Q-PCR Primer Sequences |                            |                            |              |                |                                                  |
|------------------------|----------------------------|----------------------------|--------------|----------------|--------------------------------------------------|
| Gene                   | Forward Sequence           | Reverse Sequence           | Product Size | Entrez Gene ID | Name                                             |
| Mag                    | 5'-ATCCTTCTGGAATCGCACTG-3' | 5'-CCCTCTGTCTCGTTCACA-3'   | 133          | 29409          | myelin-associated glycoprotein                   |
| Mbp                    | 5'-ACAGGAAACGGGACTTAGG-3'  | 5'-TGGGCTGTGAGAGGAAACAG-3' | 125          | 24547          | myelin basic protein                             |
| Moq                    | 5'-TGAGAGACATCCCAAGGAC-3'  | 5'-CTCATTGCCCTTGTGCCTAT-3' | 193 if F1/R1 | 24558          | myelin oligodendrocyte glycoprotein              |
| Plp                    | 5'-GCATCACCTATGCCCTGACT-3' | 5'-AGCATTCCATGGGAGAACAC-3' | 182          | 24943          | myelin proteolipid protein                       |
| Mobp                   | 5'-TACAAGGAAGTCCGGTCCAC-3' | 5'-CTGGAGGAAGGAAGGGTTTC-3' | 213          | 25037          | myelin-associated oligodendrocytic basic protein |
| Gfap                   | 5'-AGAAAACCGCATCACCATT-3'  | 5'-GGCACACCTCACATCACATC-3' | 189          | 24387          | glial fibrillary acidic protein                  |
| Actb                   | 5'-AGGGAATCGTGCCTGACAT-3'  | 5'-AAGGAGGCTGGAGAGAGAGC-3' | 182          | 81822          | actin, beta                                      |
| Gtf2b                  | 5'-TGGGATAGCTTCTGCTTGTC-3' | 5'-TCAGATCCACGCTCTCTC-3'   | 155          | 81673          | general transcription factor IIB                 |
| Tuba1a                 | 5'-GCTTCTGGTITTCACAGC-3'   | 5'-CCATGAAGGCACAATCAGAG-3' | 210          | 64158          | tubulin, alpha 1A                                |
