# Supplementary material
Source: PubMed Central journal article supplement (PMC2768476)
Supplement: NIHMS121339-supplement-02.pdf [file NIHMS121339-supplement-02.pdf]

| Gene Name                                                                | Fold Change | P-value (Based on log2) | Control Mean Expression | Cuprizone Mean Expression | P Call % of control | P Call % of cuprizone | Affymetrix Probe Set | Entrez Gene ID or UniGene ID | Myelin Marker |
|--------------------------------------------------------------------------|-------------|-------------------------|-------------------------|---------------------------|---------------------|-----------------------|----------------------|------------------------------|---------------|
| Transcribed locus                                                        | 1.34        | 0.032                   | 182                     | 244                       | 100                 | 100                   | 1397348 at           | Rn.52992.1                   |               |
| Transcribed locus                                                        | 1.36        | 0.012                   | 429                     | 581                       | 100                 | 100                   | 1379259 at           | Rn.22140.1                   |               |
| Transcribed locus                                                        | 1.46        | 0.004                   | 569                     | 833                       | 100                 | 100                   | 1383058 at           | Rn.4287.1                    |               |
| Transcribed locus                                                        | 1.53        | 0.010                   | 144                     | 221                       | 100                 | 100                   | 1371861 at           | Rn.19802.1                   |               |
| Transcribed locus                                                        | 1.59        | 0.002                   | 103                     | 165                       | 100                 | 100                   | 1396000 at           | Rn.40801.1                   |               |
| Transcribed locus                                                        | 1.79        | 0.000                   | 44                      | 79                        | 100                 | 100                   | 1374752 at           | Rn.18295.1                   |               |
| Transcribed locus                                                        | 1.88        | 0.000                   | 700                     | 1313                      | 100                 | 100                   | 1378133 at           | Rn.38677.1                   |               |
| Transcribed locus, similar to XP_580072.1 hypothetical protein XP_580072 | 1.21        | 0.040                   | 90                      | 109                       | 100                 | 100                   | 1373302 at           | Rn.6387.1                    |               |
| Trim34: tripartite motif protein 34                                      | 1.25        | 0.006                   | 159                     | 199                       | 100                 | 100                   | 1385252 at           | 293294                       |               |
| Txnip: thioredoxin interacting protein                                   | 1.59        | 0.003                   | 344                     | 546                       | 100                 | 100                   | 1371131 a at         | 117514                       |               |
| Vamp5: vesicle-associated membrane protein 5                             | 1.22        | 0.030                   | 94                      | 114                       | 100                 | 100                   | 1398840 at           | 89818                        |               |
| Vcam1: vascular cell adhesion molecule 1                                 | 1.26        | 0.001                   | 655                     | 827                       | 100                 | 100                   | 1368474 at           | 25361                        |               |
